# Supplementary material for: Genome-Wide Analysis of Germline Signaling Genes Regulating Longevity and Innate Immunity in the Nematode Pristionchus pacificus
Source: PLoS Pathog. 2012 Aug 9;8(8):e1002864. doi: 10.1371/journal.ppat.1002864 (PMC3415453; doi:10.1371/journal.ppat.1002864)
Supplement: Table S8 — List of the 292 genes exclusive to expression profile E4 (ablated versus unablated animals exposed to S. marcescens ) in a comparison against profile E1 (ablated versus unablated animals exposed to E. coli ). The log2 fold change, FDR corrected p-value and average expression value (log2 scale) of the 292 genes exclusive to profile E4. (XLS) [file ppat.1002864.s010.xls]

## Sheet: Supp Table 8
Supplememtary Table 8. List of the 292 genes exclusive to expression profile E4 (ablated versus unablated animals exposed to S. marcescens) in a comparison against profile E1 (ablated versus unablated animals exposed to E. coli)
PpaGene	celHomolog	logFC	adj.P.Val	AveExpr
Contig2-snapTAU.56	NA	3.53004	0.0135241	8.41029
Contig17-snapTAU.140	NA	3.17444	0.00102728	7.97929
Contig97-snapTAU.138	Y17G7B.23	3.1353	0.0033615	7.98673
Contig33-snapTAU.69	NA	3.07524	0.00118419	7.50179
Contig111-snapTAU.9	NA	2.99981	0.00170952	7.34572
Contig24-snapTAU.188	NA	2.84079	0.0190567	10.1985
Contig126-snapTAU.33	F40F4.6	2.80679	0.00856117	13.2202
Contig145-snapTAU.35	NA	2.77256	0.0104017	13.5569
Contig7-snapTAU.157	NA	2.74269	0.00657058	7.79987
Contig143-snapTAU.19	NA	2.6572	0.0109809	7.3867
Contig114-snapTAU.53	NA	2.65566	0.000394769	7.32732
Contig53-snapTAU.34	NA	2.44316	0.00752361	10.2266
Contig3-snapTAU.18	NA	2.39484	0.0494367	13.3222
Contig129-snapTAU.8	NA	2.39165	0.001289	13.4142
Contig19-snapTAU.20	NA	2.33418	0.00597458	12.7002
Contig12-snapTAU.203	NA	2.32657	0.0223014	12.2058
Contig21-snapTAU.55	NA	2.30268	0.0128345	7.25252
Contig3-snapTAU.461	NA	2.27932	0.00222235	7.31434
Contig11-snapTAU.19	NA	2.27788	0.0407226	8.93856
Contig10-snapTAU.226	NA	2.26115	0.00644029	8.7078
Contig13-snapTAU.279	NA	2.24161	0.0301761	7.55738
Contig19-snapTAU.226	T25B6.2	2.21361	0.0110434	13.6237
Contig2-snapTAU.251	R11A5.4	2.09008	0.00579224	12.9808
Contig39-snapTAU.36	NA	2.0868	0.0025295	12.838
Contig85-snapTAU.20	NA	2.0513	0.00591965	8.58467
Contig43-snapTAU.214	NA	1.95319	0.000995336	7.58851
Contig86-snapTAU.80	NA	1.94669	0.00523273	8.59386
Contig256-snapTAU.3	glb-18	1.92148	0.0285762	8.56099
Contig1-snapTAU.398	NA	1.90963	0.0356498	8.78186
Contig31-snapTAU.198	F42A8.1	1.889	0.0018808	12.4644
Contig116-snapTAU.61	NA	1.87318	0.00634607	13.2425
Contig24-snapTAU.147	C06C3.4	1.84076	0.00454968	7.72797
Contig120-snapTAU.9	lbp-6	1.83666	0.00245062	12.8609
Contig23-snapTAU.5	NA	1.81268	0.00591309	13.2806
Contig18-snapTAU.94	clc-4	1.79483	0.0238256	7.99733
Contig10-snapTAU.234	NA	1.78351	0.00826639	7.92065
Contig23-snapTAU.122	NA	1.78061	0.0336408	7.04742
Contig1-snapTAU.586	NA	1.77205	0.028972	7.16026
Contig23-snapTAU.106	NA	1.74912	0.0261545	12.0586
Contig65-snapTAU.62	NA	1.71551	0.00439174	7.01772
Contig114-snapTAU.51	NA	1.70651	0.0105834	7.31323
Contig32-snapTAU.13	NA	1.70608	0.00596359	7.12489
Contig94-snapTAU.87	NA	1.70135	0.0314829	6.76046
Contig45-snapTAU.221	NA	1.69468	0.0306143	7.65321
Contig51-snapTAU.118	NA	1.66343	0.00995676	7.24027
Contig12-snapTAU.531	B0238.12	1.64399	0.0113361	13.444
Contig0-snapTAU.710	NA	1.6299	0.00708216	8.0361
Contig55-snapTAU.128	NA	1.60445	0.0367945	10.6323
Contig16-snapTAU.252	NA	1.60358	0.00577557	12.4409
Contig17-snapTAU.171	NA	1.60167	0.00808346	7.90344
Contig0-snapTAU.593	sptl-2	1.60004	0.0431554	8.64913
Contig37-snapTAU.83	NA	1.59948	0.00999067	8.46217
Contig48-snapTAU.14	NA	1.58789	0.014974	7.09946
Contig19-snapTAU.77	NA	1.58196	0.0141467	7.15873
Contig113-snapTAU.55	NA	1.57732	0.0419531	9.94563
Contig22-snapTAU.223	NA	1.57642	0.0187493	7.28487
Contig17-snapTAU.107	NA	1.57034	0.00855433	12.0894
Contig89-snapTAU.21	NA	1.56843	0.0350077	11.8195
Contig0-snapTAU.698	NA	1.55099	0.04555	12.5938
Contig42-snapTAU.144	NA	1.54623	0.0186216	8.16736
Contig30-snapTAU.231	NA	1.53575	0.00764687	6.82215
Contig14-snapTAU.169	NA	1.52943	0.0100773	7.9894
Contig45-snapTAU.105	NA	1.512	0.0129122	7.11854
Contig113-snapTAU.60	NA	1.51049	0.00305695	7.27114
Contig114-snapTAU.20	T23F4.2	1.50762	0.0338612	7.15164
Contig34-snapTAU.95	NA	1.50761	0.039843	11.3167
Contig31-snapTAU.255	NA	1.50003	0.0142294	7.55794
Contig51-snapTAU.159	NA	1.48739	0.0135921	7.32857
Contig63-snapTAU.113	NA	1.47751	0.0441299	8.78183
Contig17-snapTAU.232	NA	1.455	0.0293654	8.15747
Contig90-snapTAU.19	NA	1.44799	0.00482285	7.15907
Contig124-snapTAU.9	NA	1.44324	0.0348255	13.5721
Contig28-snapTAU.305	NA	1.4254	0.0306925	6.99231
Contig12-snapTAU.116	NA	1.40817	0.0130479	7.21593
Contig7-snapTAU.451	cyn-3	1.40393	0.00837213	13.0982
Contig61-snapTAU.23	F31D5.4	1.40232	0.00749412	8.42151
Contig19-snapTAU.158	NA	1.38958	0.00513292	7.90157
Contig97-snapTAU.75	C06A8.3	1.38459	0.0469272	13.6001
Contig77-snapTAU.16	NA	1.37044	0.016161	8.89815
Contig39-snapTAU.106	NA	1.36353	0.0118754	11.5509
Contig84-snapTAU.59	NA	1.35596	0.0154746	7.72525
Contig57-snapTAU.121	NA	1.35485	0.0298017	7.22289
Contig83-snapTAU.122	NA	1.34065	0.0155776	6.67648
Contig12-snapTAU.89	NA	1.34023	0.0334289	7.10684
Contig37-snapTAU.116	NA	1.33915	0.0280716	8.00682
Contig0-snapTAU.754	NA	1.32406	0.0179644	7.85259
Contig19-snapTAU.196	NA	1.31526	0.0360858	9.23909
Contig0-snapTAU.135	NA	1.29992	0.0115268	13.2329
Contig1-snapTAU.107	NA	1.29073	0.0110645	11.1312
Contig145-snapTAU.27	NA	1.28896	0.0417923	8.97161
Contig55-snapTAU.32	dlk-1	1.28625	0.00787675	11.9077
Contig50-snapTAU.5	NA	1.28408	0.0393738	8.02234
Contig11-snapTAU.237	Y46E12A.3	1.28138	0.0424395	8.24904
Contig58-snapTAU.60	NA	1.27812	0.0469687	6.90038
Contig72-snapTAU.41	NA	1.27477	0.0109724	6.66252
Contig10-snapTAU.77	NA	1.27316	0.0256078	11.161
Contig98-snapTAU.51	NA	1.27165	0.00575085	7.27714
Contig5-snapTAU.438	NA	1.25032	0.0348955	7.18685
Contig129-snapTAU.1	NA	1.24753	0.046779	7.24677
Contig18-snapTAU.252	NA	1.24673	0.0351622	7.32903
Contig14-snapTAU.526	prx-6	1.24294	0.0213514	8.40425
Contig73-snapTAU.16	NA	1.23883	0.0316121	6.70502
Contig12-snapTAU.318	NA	1.22502	0.0390463	6.64687
Contig51-snapTAU.23	Y71G12B.6	1.2242	0.0141467	7.53482
Contig48-snapTAU.161	NA	1.22101	0.0424801	7.8839
Contig12-snapTAU.62	NA	1.20882	0.0446347	8.3087
Contig37-snapTAU.21	NA	1.20412	0.0277861	7.74649
Contig4-snapTAU.354	NA	1.19054	0.0264708	13.7667
Contig50-snapTAU.43	ucp-4	1.1902	0.0299825	8.40976
Contig89-snapTAU.34	NA	1.18844	0.023271	10.4695
Contig27-snapTAU.69	NA	1.18018	0.0368982	12.6923
Contig37-snapTAU.63	NA	1.17957	0.0452659	8.22969
Contig13-snapTAU.145	NA	1.1773	0.0416523	7.51488
Contig2-snapTAU.431	NA	1.1674	0.0188867	7.65994
Contig68-snapTAU.61	NA	1.16618	0.0253327	7.9534
Contig41-snapTAU.60	NA	1.16387	0.0421664	7.02906
Contig7-snapTAU.114	drn-1	1.16361	0.0439994	6.88993
Contig12-snapTAU.12	NA	1.16261	0.033809	7.25272
Contig12-snapTAU.384	NA	1.15491	0.0129656	6.96231
Contig19-snapTAU.92	NA	1.14702	0.0394008	7.20175
Contig28-snapTAU.180	NA	1.133	0.0480775	6.95682
Contig0-snapTAU.406	NA	1.13282	0.0247362	7.21279
Contig72-snapTAU.7	NA	1.12322	0.02739	6.88551
Contig36-snapTAU.122	NA	1.1202	0.0365808	6.86505
Contig45-snapTAU.1	NA	1.11957	0.0323694	7.28864
Contig113-snapTAU.42	NA	1.11949	0.03041	9.9769
Contig42-snapTAU.137	NA	1.11859	0.0146674	6.60112
Contig71-snapTAU.8	NA	1.11297	0.0406592	6.98276
Contig23-snapTAU.334	NA	1.11231	0.0269527	7.2796
Contig70-snapTAU.61	NA	1.10751	0.0473381	7.22248
Contig20-snapTAU.43	F26F12.3	1.10535	0.0262223	6.70865
Contig48-snapTAU.15	NA	1.10514	0.0462176	6.89395
Contig267-snapTAU.2	vhp-1	1.09287	0.031487	6.63286
Contig68-snapTAU.47	NA	1.07678	0.0445509	6.67415
Contig16-snapTAU.247	NA	1.07541	0.0478272	6.60257
Contig63-snapTAU.38	NA	1.07379	0.0323088	6.89768
Contig61-snapTAU.82	NA	1.06776	0.0289119	6.57316
Contig24-snapTAU.8	F54B3.1	1.05997	0.0410993	6.64866
Contig38-snapTAU.98	NA	1.05642	0.0251021	6.93566
Contig97-snapTAU.119	C32D5.7	1.05601	0.0426705	7.69488
Contig39-snapTAU.55	NA	1.05494	0.0215468	12.7693
Contig70-snapTAU.99	srv-7	1.05433	0.0174434	6.45497
Contig10-snapTAU.37	ada-2	1.04213	0.0433899	8.21691
Contig28-snapTAU.22	gln-3	1.03785	0.0258586	7.28355
Contig77-snapTAU.29	NA	1.03603	0.0326648	10.4272
Contig25-snapTAU.86	NA	1.03433	0.0294776	6.90813
Contig160-snapTAU.8	NA	1.03368	0.0219624	7.20043
Contig33-snapTAU.47	NA	1.03111	0.0282466	7.09764
Contig10-snapTAU.123	NA	1.02304	0.0363018	7.16875
Contig143-snapTAU.18	NA	1.02149	0.0358909	6.75929
Contig60-snapTAU.94	NA	1.01539	0.0468137	7.67531
Contig12-snapTAU.501	F13B12.2	1.01487	0.0216825	7.61547
Contig47-snapTAU.111	Y32G9B.1	1.01025	0.0261721	6.97799
Contig13-snapTAU.13	NA	1.00514	0.0430893	6.6846
Contig102-snapTAU.71	NA	1.00258	0.033609	7.14159
Contig107-snapTAU.41	NA	1.00214	0.0423548	6.53897
Contig112-snapTAU.48	F09F7.1	1.00167	0.0364271	6.5945
Contig24-snapTAU.258	T01E8.8	1.00014	0.0297869	7.20637
Contig63-snapTAU.107	NA	0.997871	0.0459561	6.70751
Contig192-snapTAU.2	NA	0.995058	0.0382722	6.87795
Contig77-snapTAU.96	NA	0.991278	0.0392152	7.59533
Contig13-snapTAU.211	osm-7	0.96847	0.0407104	7.86166
Contig46-snapTAU.85	NA	0.965502	0.0496527	6.77431
Contig80-snapTAU.74	NA	0.961965	0.0366641	6.9146
Contig5-snapTAU.466	NA	0.958917	0.0380022	6.73461
Contig62-snapTAU.120	NA	0.956636	0.043493	6.99775
Contig43-snapTAU.168	NA	0.950057	0.044859	7.35925
Contig28-snapTAU.292	NA	0.947044	0.0478484	6.74422
Contig0-snapTAU.374	NA	0.941345	0.0384494	6.55252
Contig6-snapTAU.75	NA	0.93951	0.0372819	6.9041
Contig97-snapTAU.90	gbh-1	0.938887	0.0361716	10.7973
Contig67-snapTAU.25	NA	0.936125	0.0456371	6.64262
Contig104-snapTAU.69	NA	0.934265	0.0375248	7.21329
Contig14-snapTAU.319	NA	0.928617	0.0310895	7.17657
Contig41-snapTAU.137	NA	0.927328	0.0495023	8.62796
Contig30-snapTAU.149	NA	0.92429	0.0211225	6.62372
Contig33-snapTAU.241	NA	0.916958	0.0458231	6.75825
Contig14-snapTAU.431	K10D6.4	0.916304	0.0426084	7.18971
Contig7-snapTAU.208	NA	0.908864	0.0466592	7.31542
Contig16-snapTAU.140	NA	0.9029	0.0243699	6.65684
Contig151-snapTAU.22	NA	0.882945	0.0480247	6.66197
Contig38-snapTAU.110	NA	0.864504	0.0427373	6.72763
Contig26-snapTAU.27	NA	0.849996	0.0494582	6.57817
Contig127-snapTAU.70	NA	0.834379	0.0433608	6.70196
Contig0-snapTAU.692	NA	0.828747	0.047914	6.58479
Contig149-snapTAU.2	NA	0.809394	0.046103	7.36163
Contig10-snapTAU.109	NA	-0.820931	0.0397625	6.48017
Contig1-snapTAU.108	NA	-0.827183	0.0498582	7.08407
Contig4-snapTAU.556	NA	-0.854415	0.04713	6.72662
Contig2-snapTAU.230	NA	-0.871868	0.0398897	6.55591
Contig12-snapTAU.90	NA	-0.874272	0.0467944	6.69858
Contig61-snapTAU.91	NA	-0.885869	0.0339582	6.72903
Contig18-snapTAU.192	NA	-0.886826	0.0319179	6.58251
Contig24-snapTAU.106	NA	-0.887056	0.0436123	6.49102
Contig1-snapTAU.162	NA	-0.891946	0.0430135	6.57187
Contig107-snapTAU.71	NA	-0.898767	0.0453391	6.59292
Contig98-snapTAU.27	NA	-0.906916	0.0385415	6.58413
Contig11-snapTAU.502	NA	-0.921958	0.0429381	6.87432
Contig0-snapTAU.627	NA	-0.925931	0.0431084	6.67849
Contig31-snapTAU.297	NA	-0.928038	0.0437921	6.44771
Contig22-snapTAU.185	Y39G10AR.18	-0.948031	0.0173606	6.96423
Contig28-snapTAU.260	NA	-0.950694	0.0316506	6.85269
Contig1-snapTAU.287	C34F6.1	-0.95216	0.0416905	6.63167
Contig21-snapTAU.53	NA	-0.95373	0.0392182	6.68824
Contig28-snapTAU.314	NA	-0.959959	0.04003	7.5537
Contig70-snapTAU.136	NA	-0.965664	0.0373211	6.45154
Contig7-snapTAU.531	NA	-0.977843	0.045984	6.6559
Contig104-snapTAU.39	NA	-0.981743	0.0343104	6.68087
Contig29-snapTAU.205	NA	-0.986655	0.0299558	6.71749
Contig31-snapTAU.119	cdc-42	-0.987321	0.0489766	6.96316
Contig36-snapTAU.211	NA	-0.98858	0.0356263	6.64714
Contig36-snapTAU.105	NA	-0.99448	0.0303623	6.91007
Contig104-snapTAU.101	dhs-9	-0.995353	0.0390856	10.2031
Contig48-snapTAU.18	bre-2	-0.997069	0.0404172	6.68059
Contig52-snapTAU.125	NA	-1.00146	0.031861	6.60996
Contig17-snapTAU.154	NA	-1.01728	0.0431084	6.58704
Contig66-snapTAU.17	NA	-1.02334	0.0267324	6.52543
Contig5-snapTAU.39	NA	-1.02639	0.0381775	6.55807
Contig19-snapTAU.319	NA	-1.03036	0.0204138	6.64103
Contig20-snapTAU.204	NA	-1.0349	0.0313151	6.68527
Contig7-snapTAU.153	NA	-1.03645	0.0308027	6.91361
Contig20-snapTAU.336	NA	-1.06787	0.0362312	6.67782
Contig0-snapTAU.225	NA	-1.06867	0.0445614	6.54596
Contig64-snapTAU.33	F08F3.1	-1.07547	0.0236469	6.91333
Contig41-snapTAU.167	Y43D4A.5	-1.09372	0.0334507	6.77736
Contig108-snapTAU.80	NA	-1.10152	0.0441755	7.02105
Contig106-snapTAU.67	Y48G1BM.9	-1.10539	0.0458488	6.94299
Contig120-snapTAU.15	NA	-1.1114	0.0287128	6.64189
Contig45-snapTAU.227	ugt-19	-1.11598	0.0302764	9.056
Contig12-snapTAU.418	C15B12.8	-1.12191	0.0380345	7.68991
Contig37-snapTAU.12	mff-2	-1.12589	0.0462248	8.6515
Contig156-snapTAU.13	NA	-1.14524	0.0181547	6.91073
Contig16-snapTAU.246	NA	-1.14884	0.0388179	6.81885
Contig51-snapTAU.52	NA	-1.15077	0.0463962	6.63117
Contig5-snapTAU.527	dsh-1	-1.16436	0.0492176	6.82211
Contig37-snapTAU.189	nhr-25	-1.16653	0.0248977	6.56573
Contig52-snapTAU.190	NA	-1.17554	0.0196143	7.6538
Contig51-snapTAU.130	NA	-1.17843	0.011891	6.59976
Contig22-snapTAU.93	NA	-1.18157	0.0089277	7.32937
Contig72-snapTAU.46	Y94H6A.7	-1.19226	0.0308679	9.85758
Contig1-snapTAU.463	NA	-1.19916	0.0402397	6.72099
Contig0-snapTAU.343	NA	-1.20651	0.0263395	6.67273
Contig70-snapTAU.119	T05B11.7	-1.20962	0.0439326	6.94997
Contig60-snapTAU.46	tag-83	-1.21067	0.0144431	7.45397
Contig83-snapTAU.44	NA	-1.21078	0.0212579	6.64754
Contig125-snapTAU.9	NA	-1.2159	0.0498606	6.75392
Contig12-snapTAU.421	NA	-1.2182	0.0326277	6.67433
Contig44-snapTAU.184	K12H4.5	-1.21875	0.0251412	10.0088
Contig7-snapTAU.414	NA	-1.21947	0.0462155	6.64244
Contig14-snapTAU.337	NA	-1.21948	0.0451827	7.30453
Contig18-snapTAU.227	C16B8.4	-1.22277	0.0279918	6.8562
Contig12-snapTAU.51	NA	-1.2306	0.0186085	6.64458
Contig137-snapTAU.17	Y43F8C.13	-1.23527	0.0319632	7.9755
Contig10-snapTAU.30	NA	-1.23845	0.017232	7.23062
Contig23-snapTAU.277	NA	-1.23993	0.0291337	6.96051
Contig130-snapTAU.37	NA	-1.25522	0.0316961	6.59408
Contig4-snapTAU.615	NA	-1.26168	0.0421572	6.84002
Contig7-snapTAU.79	gbh-2	-1.2657	0.0268525	6.82257
Contig121-snapTAU.10	snap-1	-1.27613	0.0166955	7.24711
Contig12-snapTAU.274	NA	-1.27764	0.0244079	7.6878
Contig102-snapTAU.36	F35H12.1	-1.29044	0.0154211	6.51931
Contig22-snapTAU.219	C30F12.3	-1.30695	0.0128086	6.85544
Contig12-snapTAU.360	NA	-1.32128	0.0148193	7.45364
Contig77-snapTAU.65	NA	-1.32247	0.0151063	8.18823
Contig70-snapTAU.98	NA	-1.33215	0.0409329	6.78232
Contig8-snapTAU.445	NA	-1.34489	0.0266105	6.86329
Contig17-snapTAU.54	NA	-1.34605	0.048257	7.00344
Contig27-snapTAU.104	Y116A8C.30	-1.34676	0.0276043	8.26685
Contig1-snapTAU.164	NA	-1.34838	0.00381105	6.63268
Contig23-snapTAU.99	NA	-1.36676	0.0252235	6.65918
Contig95-snapTAU.10	C53H9.3	-1.37002	0.021564	7.87605
Contig8-snapTAU.355	NA	-1.38411	0.0285167	6.76381
Contig121-snapTAU.9	NA	-1.41726	0.00961037	6.90871
Contig12-snapTAU.76	NA	-1.42442	0.0386045	6.71222
Contig168-snapTAU.3	NA	-1.43134	0.00749412	7.00795
Contig4-snapTAU.251	tatn-1	-1.46864	0.0246903	8.1272
Contig48-snapTAU.127	NA	-1.48892	0.0282678	7.09758
Contig35-snapTAU.203	Y56A3A.7	-1.49249	0.00643033	7.05763
Contig36-snapTAU.59	VF13D12L.1	-1.52037	0.0155964	7.21481
Contig56-snapTAU.142	sav-1	-1.53311	0.0155666	7.60489
Contig31-snapTAU.109	NA	-1.55627	0.0330832	9.17993
Contig13-snapTAU.427	NA	-1.60336	0.0429491	7.2139
Contig22-snapTAU.258	NA	-1.70046	0.00237173	7.06124
Contig14-snapTAU.304	NA	-1.78216	0.0327531	7.51013
Contig26-snapTAU.20	NA	-1.88397	0.0079653	6.65936
Contig20-snapTAU.191	NA	-1.89642	0.0167943	7.00615
Contig146-snapTAU.32	try-4	-1.90384	0.00428108	8.06748
Contig104-snapTAU.129	K12C11.7	-1.90523	0.0143455	9.10856
Contig27-snapTAU.57	NA	-1.92328	0.00762635	8.06862
Contig46-snapTAU.73	NA	-1.95396	0.00223973	7.49622
Contig29-snapTAU.25	NA	-1.96788	0.0102064	7.71974
Contig31-snapTAU.265	nrf-6	-2.20901	0.0331743	7.47428
